# Supplementary material for: Safety and Tolerability of SGLT2 Inhibitors in Cardiac Amyloidosis—A Clinical Feasibility Study
Source: MDPI journal article supplement (doi:10.3390/jcm13010283), 2024-01-04
Supplement: s1 [file s1]

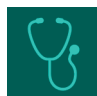

## Supplement

**Table S1.** Changes in echocardiographic parameters during SGLT2i medication.

| Value                  | N  | Initial value | Mean change | P-value         |
|------------------------|----|---------------|-------------|-----------------|
| IVSd (mm)              | 76 | 17.6          | -0.0        | 0.87            |
| LVPWd (mm)             | 76 | 14.2          | +0.0        | 0.13            |
| RV wall thickness (mm) | 62 | 6.68          | +0.52       | <b>0.05</b>     |
| LVEDV biplane (ml)     | 73 | 95.7          | +8.14       | <b>0.04</b>     |
| LV stroke volume (ml)  | 70 | 75.8          | -6.25       | <b>0.01</b>     |
| Cardiac output (l/min) | 69 | 5.10          | -0.50       | <b>&lt;0.01</b> |
| LVEF biplane (%)       | 76 | 51.4          | -0.29       | 0.78            |
| GLPS                   | 67 | -11.9         | +0.97       | 0.55            |
| MV E/E' mean           | 68 | 17.6          | -1.40       | <b>0.03</b>     |
| MAPSE septal (mm)      | 70 | 7.36          | -0.46       | 0.10            |
| MAPSE lateral (mm)     | 70 | 8.73          | -0.31       | 0.32            |
| MV E max (ms)          | 70 | 0.87          | -0.03       | 0.07            |
| MV E' septal (cm/s)    | 70 | 4.35          | +0.01       | 0.93            |
| MV E' mean (cm/s)      | 67 | 5.54          | -0.17       | 0.42            |
| TAPSE (cm)             | 74 | 1.83          | -0.27       | 0.14            |
| TV S' (cm/s)           | 63 | 10.1          | +0.06       | 0.85            |
| TR max PG (mmHg)       | 67 | 35.4          | -3.29       | <b>&lt;0.01</b> |

**Table S1:** Changes in echocardiographic parameters during SGLT2i medication (all normally distributed). E: early mitral inflow velocity. E': early LV relaxation velocity. GLPS: global longitudinal peak strain. IVSd: interventricular septal wall diameter. LV: left ventricle. LVEDV: left-ventricular-end-diastolic volume. LVEF: left-ventricular-ejection fraction. LVPWd: left-ventricular posterior wall diameter. MAPSE: mitral annular plane systolic excursion. MV: mitral valve. RV: right ventricle. RVS: lateral tricuspid annulus peak systolic velocity. TAPSE: tricuspid annulus peak systolic excursion. TR max PG: maximal systolic pressure gradient across tricuspid valve. TV-S': peak systolic tissue velocity. We tested for significant differences in the normally distributed variables with the paired t-test.

**Table S2.** Changes in laboratory parameters during SGLT2i medication.

| A) Normally distributed serological parameters | N  | Initial mean | Mean change | Two-sided p |
|------------------------------------------------|----|--------------|-------------|-------------|
| Sodium (mmol/L)                                | 77 | 140.61       | -1.64       | <0.01       |
| Potassium (mmol/L)                             | 77 | 4.53         | -0.05       | 0.33        |
| Calcium (mmol/L)                               | 77 | 2.34         | +0.03       | 0.07        |
| Chloride (mmol/L)                              | 74 | 101.74       | -1.27       | <0.01       |
| Phosphate (mmol/L)                             | 77 | 1.19         | -0.04       | 0.05        |
| Serum protein (g/dL)                           | 77 | 6.74         | +0.09       | 0.15        |
| Serum albumin (g/dL)                           | 77 | 4.24         | +0.01       | 0.77        |
| Prealbumin (mg/dL)                             | 36 | 27.27        | -0.03       | 0.96        |
| Total cholesterol (mg/dL)                      | 74 | 173.65       | -2.88       | 0.55        |
| Creatinine/(mg/dL)                             | 77 | 1.44         | +0.09       | 0.06        |
| eGFR (CKD EPI. ml/min/1.73 m <sup>2</sup> )    | 77 | 49.89        | -2.67       | <0.01       |
| Cystatin C (mg/L)                              | 70 | 1.56         | +0.12       | <0.01       |
| Urea (mg/dL)                                   | 77 | 59.30        | +2.50       | 0.46        |
| Uric acid (mg/dL)                              | 77 | 8.04         | -0.88       | <0.01       |
| ALAT (U/L)                                     | 77 | 22.84        | -1.35       | 0.15        |
| ASAT (U/L)                                     | 77 | 30.15        | -1.51       | 0.08        |
| Choline esterase (U/L)                         | 62 | 6472.19      | +78.31      | 0.49        |
| GGT (U/L)                                      | 76 | 109.69       | -7.15       | 0.51        |
| Bilirubin (mg/dL)                              | 70 | 0.78         | +0.01       | 0.68        |
| PTT (s)                                        | 74 | 27.23        | +1.41       | <0.01       |
| INR                                            | 74 | 1.22         | -0.03       | 0.42        |
| Thrombocytes/nL                                | 76 | 191.50       | +7.94       | 0.19        |
| Hematocrit (%)                                 | 76 | 40.23        | +0.75       | 0.07        |
| Hemoglobin (g/dL)                              | 76 | 13.51        | +0.26       | 0.04        |
| Leukocytes/nL                                  | 76 | 7.15         | +0.06       | 0.80        |

  

| B) Non-normally distributed serological parameters | n  | Before initiation median (quartiles) | After initiation median (quartiles) | p-value |
|----------------------------------------------------|----|--------------------------------------|-------------------------------------|---------|
| NTproBNP (pg/mL)                                   | 69 | 2213 (933; 3661.5)                   | 2484 (987; 4551)                    | 0.534   |
| C-reactive protein (mg/dL)                         | 48 | 0.35 (0.17; 0.55)                    | 0.41 (0.25; 0.94)                   | 0.232   |
| hsTroponinT (pg/mL)                                | 70 | 41.3 (28.33; 72.43)                  | 47.95 (28.38; 64.7)                 | <0.01   |

| C) Urinalysis                      | n  | Before initiation<br>median (quartiles) | After initiation<br>median (quartiles) | p-value |
|------------------------------------|----|-----------------------------------------|----------------------------------------|---------|
| Erythrocytes (1/μL urine)          | 64 | 3 (1; 5)                                | 2 (1; 4)                               | 0.043   |
| Leukocytes (1/μL urine)            | 63 | 3 (1; 8.25)                             | 1.5 (1; 7)                             | 0.443   |
| Bacteria (1/μL urine)              | 61 | 4 (1; 24)                               | 5 (1; 20)                              | 0.737   |
| Albumin/creatinine (mg/g in urine) | 48 | 49.45 (21.6; 214.98)                    | 51.5 (20.5; 234.65)                    | 0.532   |
| Protein/creatinine (mg/g in urine) | 48 | 143 (100; 441)                          | 155 (109; 350)                         | 0.712   |

**Table S2:** Changes in A) normally distributed; B) non-normally distributed variables in blood serum; and C) parameters in urine (all non-normally distributed) during SGLT2i medication. ALAT: alanine transaminase. ASAT: aspartate transaminase. CKD EPI: Chronic Kidney Disease Epidemiology Collaboration estimator. eGFR: estimated glomerular filtration rate. GGT: gamma-glutamyl-transferase. Hs-TropT: highly sensitive troponinT. INR: international normalized ratio for quick values. NT-proBNP: N-terminal pro-brain-natriuretic peptide. PTT: partial thromboplastin time. A) Paired t-test or Wilcoxon signed-rank test was used, according to the nature of the data. B, C) Descriptives of these non-normally distributed variables are reported for before and after the initiation of SGLT2-inhibitor therapy. Pairwise comparisons were analyzed with the Wilcoxon paired signed rank test.
